# Supplementary material
Source: publisher figshare collection journal article supplement (https://tandf.figshare.com/ndownloader/files/13212965)
Supplement: Supplementary file 1 [file 13212965]

**SUPPLEMENTARY MATERIAL**

**
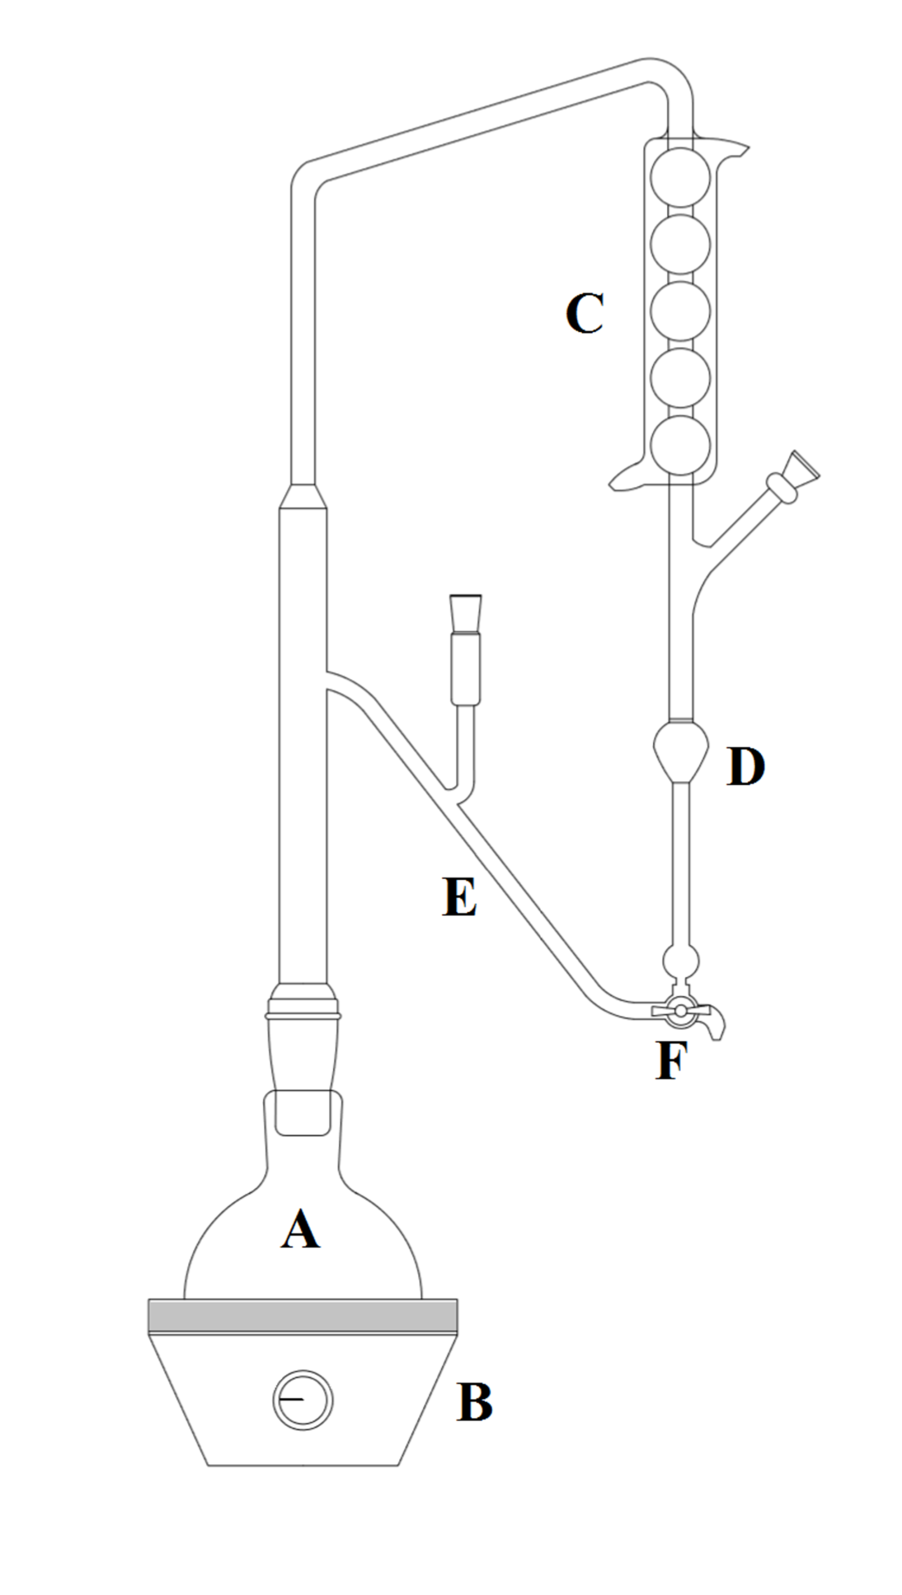
**

**Figure S1.** Schematic diagram of the system extraction type Clevenger: (A) 2 L round-bottom flask; (B) 2 L heating mantle; (C) Condenser; (D) Reservoir of essential oil and water; (E) Return of water; and (F) Valve.
